# Supplementary material for: Dexmedetomidine inhibits LPS-induced proinflammatory responses via suppressing HIF1α-dependent glycolysis in macrophages
Source: publisher site journal article supplement (doi:10.18632/aging.103226), 2020-05-20
Supplement: Supplementary file [file aging-v12i10-103226-supplementary-material-SD1.pdf]

## SUPPLEMENTARY FIGURE

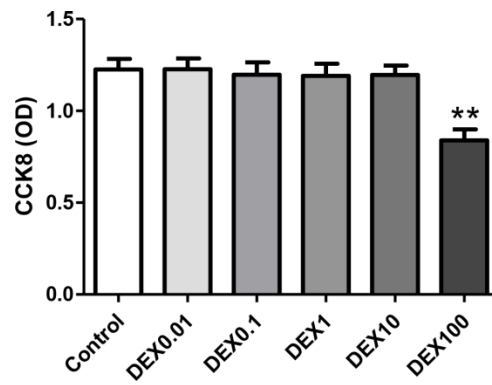

**Supplementary Figure 1. Effect of DEX at different concentrations on BMDMs viability after incubation for 24h.** BMDMs were treated with graded concentrations of DEX (0.01, 0.1, 1, 10, and 100 $\mu$ M) for 24h. The cell viability of BMDMs were determined using the CCK-8 assay. n = 3; mean  $\pm$  SEM; \*\*  $P < 0.01$ .
