# Supplementary material for: Dexmedetomidine inhibits LPS-induced proinflammatory responses via suppressing HIF1α-dependent glycolysis in macrophages
Source: publisher site journal article supplement (doi:10.18632/aging.103226), 2020-05-20
Supplement: Supplementary file [file aging-v12i10-103226-supplementary-material-SD2.pdf]

## SUPPLEMENTARY TABLE

**Supplementary Table 1. Primers for RT-PCR.**

| <b>Genes</b>  | <b>Forward primers (5'-3')</b> | <b>Reverse primers (5'-3')</b> |
|---------------|--------------------------------|--------------------------------|
| TNF $\alpha$  | aatggcctccctctcatcag           | cccttgaagagaacctggga           |
| IL-6          | taccactccaacagacctg            | ggtactccagaagaccagagg          |
| GLUT1         | cagttcggetataaacactggg         | gccccgacagagaagatg             |
| HK2           | tgatcgctgcttattcacgg           | aaccgcctagaatctccaga           |
| PFKFB3        | agaagctgactcgtacctc            | aaggcacactgttttcggac           |
| HIF1 $\alpha$ | tcaagtcagcaacgtggaag           | tatcgaggctgtgtcgactg           |
| B2M           | cggcctgtatgctatccaga           | gggtgaattcagtgtgagcc           |
